# Supplementary material for: Risk of New-Onset Diabetes Mellitus as a Post-COVID-19 Condition and Possible Mechanisms: A Scoping Review
Source: MDPI journal article supplement (doi:10.3390/jcm12031159), 2023-02-01
Supplement: s1 [file s1]

**Table S1.** PRISMA—ScR Checklist for current scoping review.

| Item | PRISMA-ScR CHECKLIST ITEM                                                                                                                                                                                                                                                                                  | Done?                               | Section                |
|------|------------------------------------------------------------------------------------------------------------------------------------------------------------------------------------------------------------------------------------------------------------------------------------------------------------|-------------------------------------|------------------------|
| 1    | Identify the report as a scoping review.                                                                                                                                                                                                                                                                   | Yes                                 | Title                  |
| 2    | Provide a structured summary that includes (as applicable): background, objectives, eligibility criteria, sources of evidence, charting methods, results, and conclusions that relate to the review questions and objectives.                                                                              | Yes                                 | Abstract               |
| 3    | Describe the rationale for the review in the context of what is already known. Explain why the review questions/objectives lend themselves to a scoping review approach.                                                                                                                                   | Yes                                 | Background             |
| 4    | Provide an explicit statement of the questions and objectives being addressed with reference to their key elements (e.g., population or participants, concepts, and context) or other relevant key elements used to conceptualize the review questions and/or objectives.                                  | Yes                                 | Objective              |
| 5    | Indicate whether a review protocol exists; state if and where it can be accessed (e.g., a Web address); and if available, provide registration information, including the registration number.                                                                                                             | Yes                                 | Methods                |
| 6    | Specify characteristics of the sources of evidence used as eligibility criteria (e.g., years considered, language, and publication status), and provide a rationale.                                                                                                                                       | Yes                                 | Methods                |
| 7    | Describe all information sources in the search (e.g., databases with dates of coverage and contact with authors to identify additional sources), as well as the date the most recent search was executed.                                                                                                  | Yes                                 | Methods                |
| 8    | Present the full electronic search strategy for at least 1 database, including any limits used, such that it could be repeated.                                                                                                                                                                            | Yes                                 | Supplementary Table S2 |
| 9    | State the process for selecting sources of evidence (i.e., screening and eligibility) included in the scoping review.                                                                                                                                                                                      | Yes                                 | Methods                |
| 10   | Describe the methods of charting data from the included sources of evidence (e.g., calibrated forms or forms that have been tested by the team before their use, and whether data charting was done independently or in duplicate) and any processes for obtaining and confirming data from investigators. | Yes                                 | Methods                |
| 11   | List and define all variables for which data were sought and any assumptions and simplifications made.                                                                                                                                                                                                     | Yes                                 | Methods                |
| 12   | If done, provide a rationale for conducting a critical appraisal of included sources of evidence; describe the methods used and how this information was used in any data synthesis (if appropriate).                                                                                                      | No; No critical appraisal conducted |                        |

|    |                                                                                                                                                                                                 |                                     |                                                |
|----|-------------------------------------------------------------------------------------------------------------------------------------------------------------------------------------------------|-------------------------------------|------------------------------------------------|
| 13 | Describe the methods of handling and summarizing the data that were charted.                                                                                                                    | Yes                                 | Methods                                        |
| 14 | Give numbers of sources of evidence screened, assessed for eligibility, and included in the review, with reasons for exclusions at each stage, ideally using a flow diagram.                    | Yes                                 | Figure 1: PRISMA diagram                       |
| 15 | For each source of evidence, present characteristics for which data were charted and provide the citations.                                                                                     | Yes                                 | Characteristics of included studies<br>Table 1 |
| 16 | If done, present data on critical appraisal of included sources of evidence (see item 12).                                                                                                      | No; No critical appraisal conducted |                                                |
| 17 | For each included source of evidence, present the relevant data that were charted that relate to the review questions and objectives.                                                           | Yes                                 | Summary of findings table 2 and 3              |
| 18 | Summarize and/or present the charting results as they relate to the review questions and objectives.                                                                                            | Yes                                 | Results                                        |
| 19 | Summarize the main results (including an overview of concepts, themes, and types of evidence available), link to the review questions and objectives, and consider the relevance to key groups. | Yes                                 | Results                                        |
| 20 | Discuss the limitations of the scoping review process.                                                                                                                                          | Yes                                 | Discussion/Limitation                          |
| 21 | Provide a general interpretation of the results with respect to the review questions and objectives, as well as potential implications and/or next steps.                                       | Yes                                 | Discussion                                     |
| 22 | Describe sources of funding for the included sources of evidence, as well as sources of funding for the scoping review. Describe the role of the funders of the scoping review.                 | Yes                                 | Funding Acknowledgements                       |

**Table S2.** Search strategy.

| MEDLINE-PubMed |         |                                                                                                                                                                                                                                                                                                                                                                                      |
|----------------|---------|--------------------------------------------------------------------------------------------------------------------------------------------------------------------------------------------------------------------------------------------------------------------------------------------------------------------------------------------------------------------------------------|
| #1             | 285,813 | COVID-19 OR "COVID 19" [MeSH Terms] OR COVID-2019 OR SARS-CoV-2 OR 2019-nCoV OR 2019-SARS-CoV-2                                                                                                                                                                                                                                                                                      |
| #2             | 70,339  | "long-term Covid" OR long-term OR consequence* OR "long-term impact" OR "long-term effect" OR "post-acute" OR long-tail OR persist* OR "chronic-COVID" OR "long-COVID" OR "long-haul" .ab OR "Long COVID" or "long haulers" or "post-acute COVID" or "persistent COVID" or "chronic COVID syndrome"                                                                                  |
| #3             | 2827    | #1 AND #2                                                                                                                                                                                                                                                                                                                                                                            |
| #4             | 844,233 | "Diabetes Mellitus"[Mesh] OR "Diabetes Mellitus, Type 2"[Mesh] OR "Diabetes Mellitus, Type 1"[Mesh] OR "glucose intolerance"[Mesh] OR "insulin resistance"[Mesh] OR "Hyperglycemia"[Mesh] OR "Diabetes Mellitus"[Text] OR "Diabetes Mellitus, Type 2"[Text] OR "diabetes type 1"[Text] OR "T2DM"[Text] OR "diabetes Type II"[Text] OR "diabetes Type I"[Text] OR "diabetes"[Text] OR |

|               |           |                                                                                                                                                                                                                                                 |
|---------------|-----------|-------------------------------------------------------------------------------------------------------------------------------------------------------------------------------------------------------------------------------------------------|
|               |           | "glucose intolerance"[Text] OR "insulin resistance"[Text] OR "Hyperglycemia"[Text]                                                                                                                                                              |
| #6            | 115       | (#3) AND (#4)                                                                                                                                                                                                                                   |
| <b>Embase</b> |           |                                                                                                                                                                                                                                                 |
| #1            | 293,857   | '2019 ncov' OR 2019ncov OR 'covid 19' OR 'sars cov 2' OR (wuhan AND coronavirus AND [12-1-2019]/sd)                                                                                                                                             |
| #2            | 46,677    | ((survivor* OR recover* OR persistent OR follow) AND up OR discharge* OR sequela* OR long) AND ('covid'/exp OR covid) AND [embase]/lim                                                                                                          |
| #3            | 43,513    | #1 AND #2                                                                                                                                                                                                                                       |
| #4            | 1,302,407 | ('diabetes mellitus')/br OR (('diabetes mellitus'):ti,ab,kw) OR (('non insulin dependent diabetes mellitus'):ti,ab,kw) OR (('insulin dependent diabetes mellitus'):ti,ab,kw) OR ((hyperglycemia):ti,ab,kw) OR (('insulin resistance'):ti,ab,kw) |
| #5            | 266       | (#3) AND (#4)                                                                                                                                                                                                                                   |
| <b>Scopus</b> |           |                                                                                                                                                                                                                                                 |
| #1            | 48,627    | (TITLE-ABS-KEY (long AND covid) OR TITLE-ABS-KEY (post AND covid) OR TITLE-ABS-KEY (post-acute AND covid-19))                                                                                                                                   |
| #2            | 261,907   | (TITLE-ABS-KEY (diabete!) OR TITLE-ABS-KEY (hyperglycemia) OR TITLE-ABS-KEY ("insulin resistance"))                                                                                                                                             |
| #3            | 196       | (#1) AND (#2)                                                                                                                                                                                                                                   |

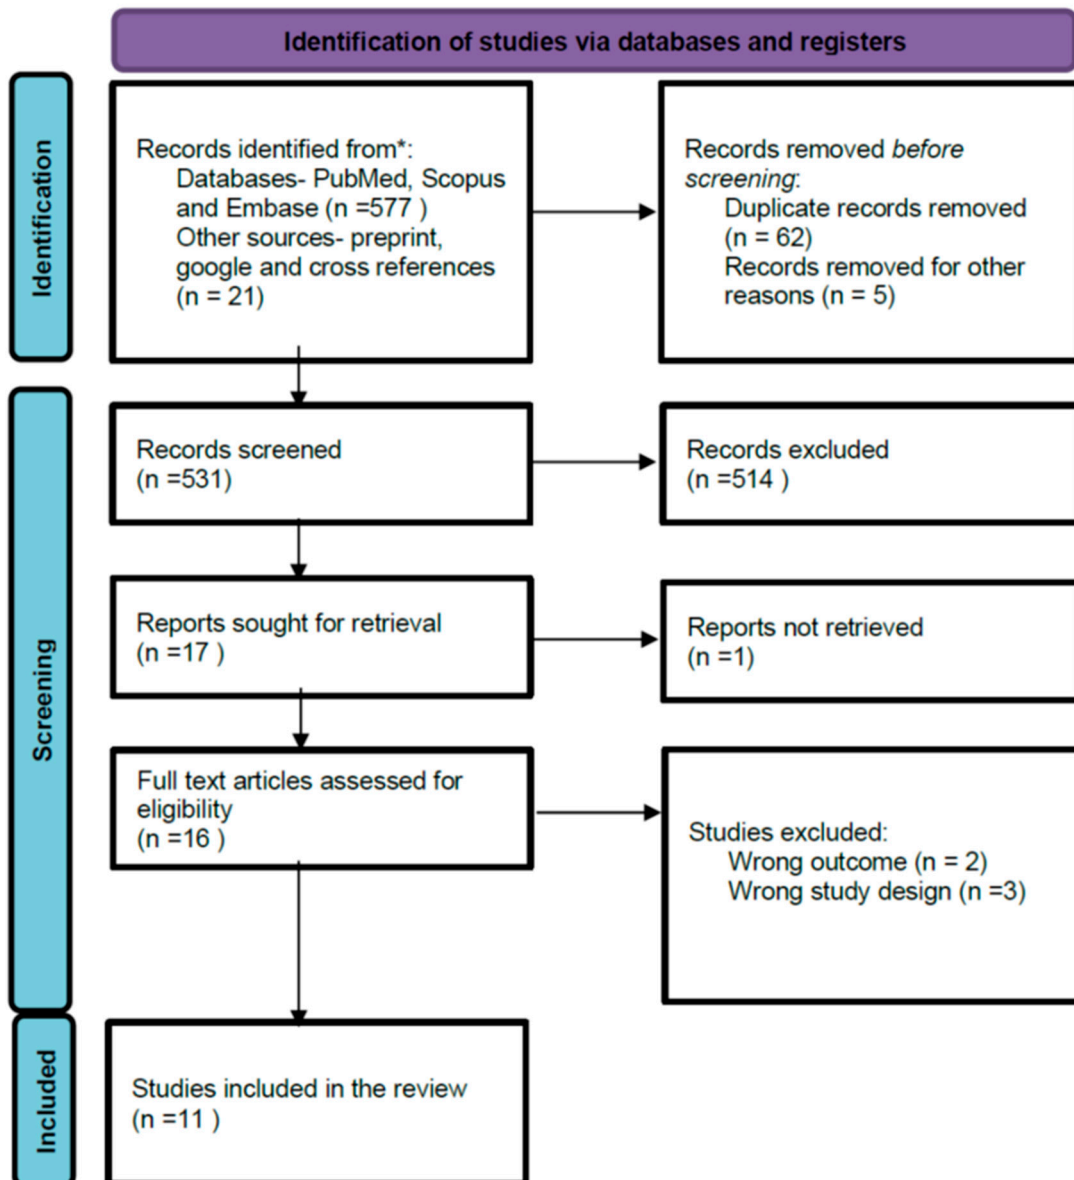

Figure S1. PRISMA Diagram.
